# Supplementary material for: Longitudinal T2 Mapping and Texture Feature Analysis in the Detection and Monitoring of Experimental Post-Traumatic Cartilage Degeneration
Source: PubMed Central journal article supplement (PMC8000874; doi:10.3390/life11030201), 2021-03-05
Supplement: life-11-00201-s001.pdf [file life-11-00201-s001.pdf]

## Supplementary Material

**Title:** Longitudinal T2 Mapping and Texture Feature Analysis in the Detection and Monitoring of Experimental Post-Traumatic Cartilage Degeneration

**Authors:** Marc Sebastian Huppertz, Justus Schock, Karl Ludger Radke, Daniel Benjamin Abrar, Manuel Post, Christiane Kuhl, Daniel Truhn and Sven Nebelung

**Journal:** Life

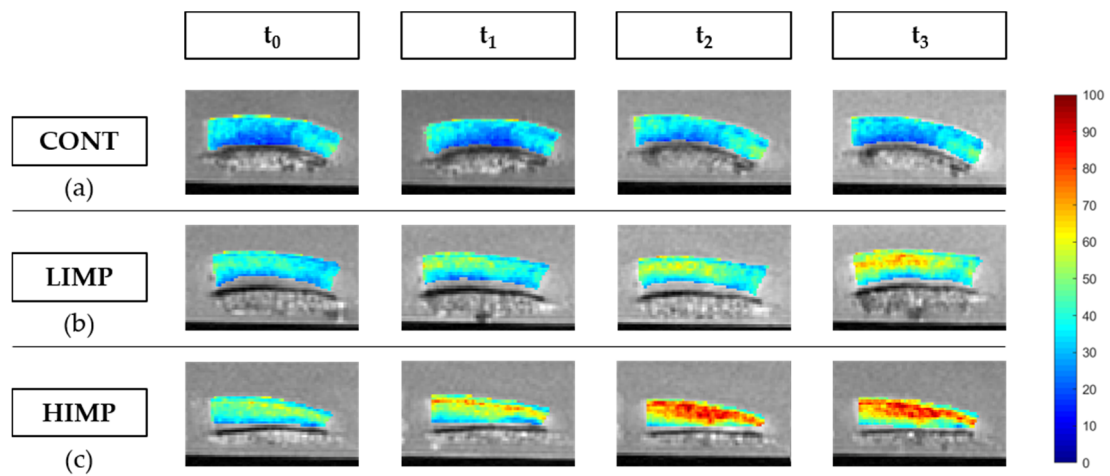

**Supplementary Figure S1.** Additional examples of color-coded and spatially resolved T2 parameter maps of representative cartilage samples and their post-impaction changes. See **Figure 4** for details on groups and time lines as well as abbreviations.

**Supplementary Table S1.** Dunn’s multiple comparison post-hoc details of time-related pair-wise comparisons of absolute T2 values, i.e., t<sub>0</sub> to t<sub>3</sub>, and as a function of impactation energy level. Respective p-values indicate post-hoc results of pair-wise comparisons in the entire cartilage sample (entire) and the superficial and deep tissue layers. LIMP – low-energy impactation, HIMP – high-energy impactation. Significant differences are printed in **bold type**.

| Group | Comparison                        | Region of Interest |                  |                  |
|-------|-----------------------------------|--------------------|------------------|------------------|
|       |                                   | entire             | superficial      | deep             |
| LIMP  | t <sub>0</sub> vs. t <sub>1</sub> | 0.021              | 0.033            | 0.051            |
|       | t <sub>0</sub> vs. t <sub>2</sub> | <b>&lt;0.001</b>   | <b>0.002</b>     | <b>&lt;0.001</b> |
|       | t <sub>0</sub> vs. t <sub>3</sub> | <b>&lt;0.001</b>   | <b>&lt;0.001</b> | <b>&lt;0.001</b> |
|       | t <sub>1</sub> vs. t <sub>2</sub> | 1.000              | 1.000            | 0.859            |
|       | t <sub>1</sub> vs. t <sub>3</sub> | 0.474              | 1.000            | 0.115            |
|       | t <sub>2</sub> vs. t <sub>3</sub> | 1.000              | 1.000            | 1.000            |
| HIMP  | t <sub>0</sub> vs. t <sub>1</sub> | <b>0.008</b>       | <b>0.005</b>     | 0.013            |
|       | t <sub>0</sub> vs. t <sub>2</sub> | <b>&lt;0.001</b>   | <b>&lt;0.001</b> | <b>&lt;0.001</b> |
|       | t <sub>0</sub> vs. t <sub>3</sub> | <b>&lt;0.001</b>   | <b>&lt;0.001</b> | <b>&lt;0.001</b> |
|       | t <sub>1</sub> vs. t <sub>2</sub> | 1.000              | 1.000            | 1.000            |
|       | t <sub>1</sub> vs. t <sub>3</sub> | 0.859              | 1.000            | 0.474            |
|       | t <sub>2</sub> vs. t <sub>3</sub> | 1.000              | 1.000            | 1.000            |

**Supplementary Table S2.** Dunn’s multiple comparison post-hoc details of group-related pair-wise comparisons of absolute T2 values at distinct time points as a function of region-of-interest. Given are the p-values for pair-wise group comparisons at distinct time points, i.e., t<sub>0</sub> – t<sub>3</sub>. Significant differences are printed in **bold type**. Please refer to **Supplementary Table S1** (above) for an explanation of the abbreviations.

| Region-of-Interest      | Comparison    | t <sub>0</sub> | t <sub>1</sub> | t <sub>2</sub> | t <sub>3</sub> |
|-------------------------|---------------|----------------|----------------|----------------|----------------|
| Entire cartilage sample | CONT vs. LIMP | 1.000          | 1.000          | 0.739          | 0.526          |
|                         | CONT vs. HIMP | 1.000          | 0.075          | 0.022          | <b>0.003</b>   |
|                         | LIMP vs. HIMP | 0.269          | 0.033          | 0.1875         | 0.050          |
| Superficial layer       | CONT vs. LIMP | 1.000          | 1.000          | 0.250          | 0.312          |
|                         | CONT vs. HIMP | 0.069          | 0.017          | <b>0.001</b>   | <b>0.001</b>   |
|                         | LIMP vs. HIMP | 0.073          | 0.043          | 0.081          | 0.067          |
| Deep layer              | CONT vs. LIMP | 0.284          | 1.000          | 1.000          | 1.000          |
|                         | CONT vs. HIMP | 0.795          | 1.000          | 1.000          | 0.034          |
|                         | LIMP vs. HIMP | 1.000          | 0.180          | 1.000          | 0.036          |

**Supplementary Table S3.** Tukey's multiple comparison post-hoc details of pair-wise comparisons of relative changes in T2 values  $\Delta_x$  as a function of region-of-interest and pair-wise group comparison.  $\Delta_x$  refers to the relative change at time point  $t_x$  and is calculated by  $\Delta_x = ((T2_{t_x}/T2_{t_0}) - 1) * 100$  [%]. Significant differences are printed in **bold type**. Please refer to **Supplementary Table S1** (above) for an explanation of the abbreviations.

| Relative Change | Comparison    | Region-of-Interest |              |                  |
|-----------------|---------------|--------------------|--------------|------------------|
|                 |               | entire             | superficial  | deep             |
| $\Delta_1$      | CONT vs. LIMP | 0.055              | 0.048        | 0.447            |
|                 | CONT vs. HIMP | <b>&lt;0.001</b>   | <b>0.001</b> | 0.014            |
|                 | LIMP vs. HIMP | 0.045              | 0.204        | 0.092            |
| $\Delta_2$      | CONT vs. LIMP | 0.052              | 0.132        | 0.070            |
|                 | CONT vs. HIMP | <b>0.0097</b>      | 0.033        | 0.015            |
|                 | LIMP vs. HIMP | 0.691              | 0.704        | 0.687            |
| $\Delta_3$      | CONT vs. LIMP | 0.215              | 0.374        | 0.085            |
|                 | CONT vs. HIMP | <b>&lt;0.001</b>   | <b>0.004</b> | <b>&lt;0.001</b> |
|                 | LIMP vs. HIMP | 0.019              | 0.033        | 0.017            |
